# Supplementary material for: Risk factors for kidney stone disease recurrence: a comprehensive meta-analysis
Source: Springer Nature journal article supplement (doi:10.1186/s12894-022-01017-4), 2022-04-19

**Figure S1:** Forest plots of studies evaluating association between identified three demographic risk factors and KSD relapse.

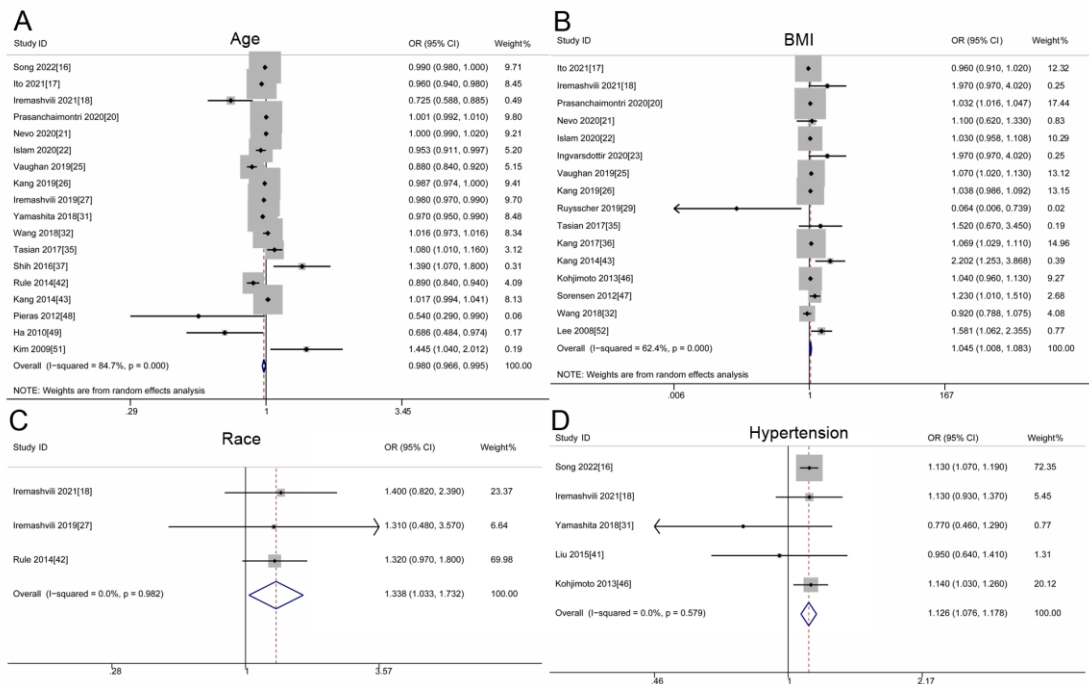

**Figure S2:** Forest plots of studies evaluating association between identified nine kidney stone-related risk factors and KSD relapse.

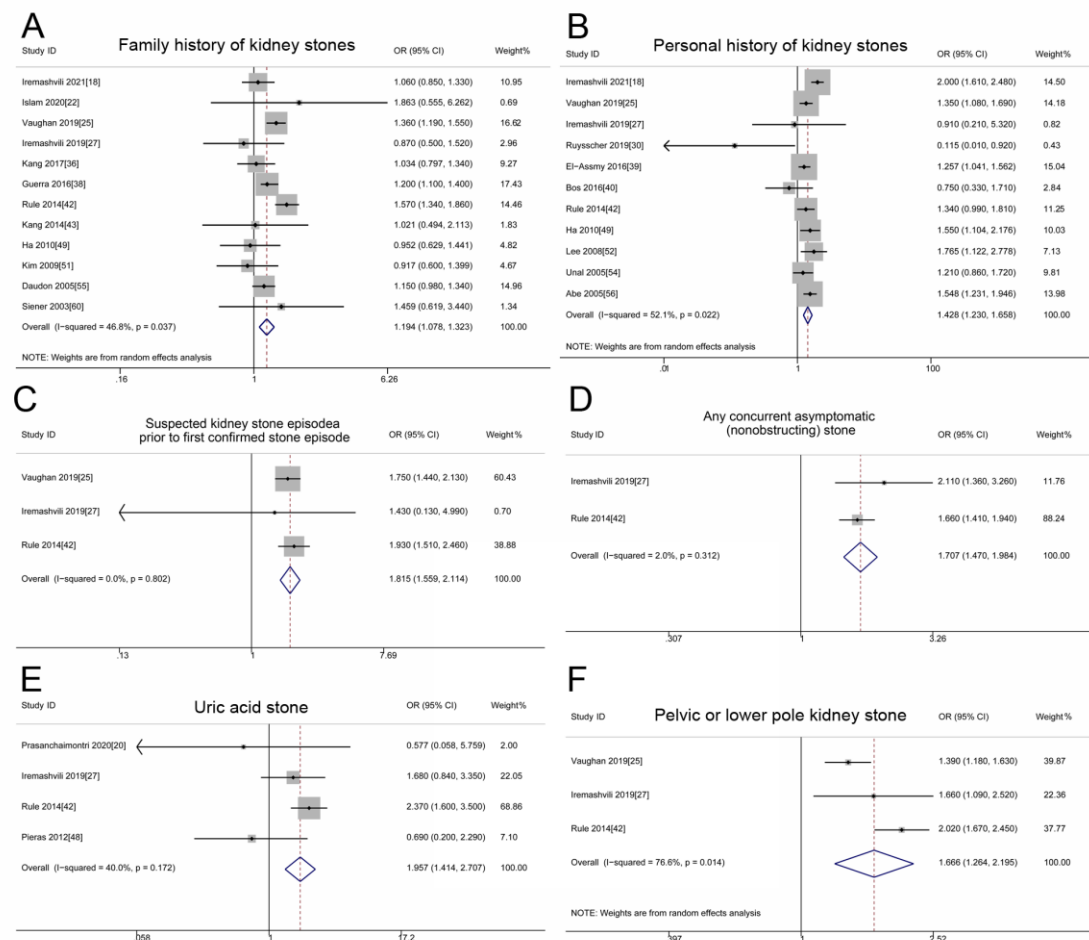

**Figure S3:** Forest plots of studies evaluating association between the risk factors of surgery and 24h urine test completion and KSD relapse.

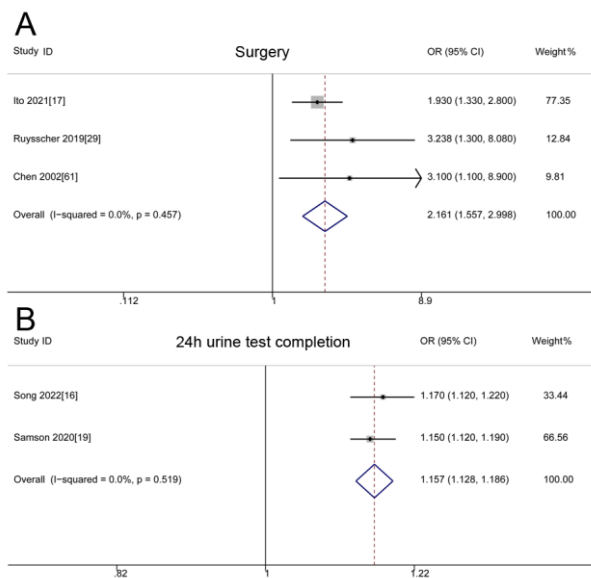

Supplement: MOESM2 [file 20324300]
